# Supplementary material for: A strategy towards melanin-based functional material: rGO and sulfonated melanin composites
Source: Royal Society of Chemistry journal article supplement (doi:10.1039/d1tc02749b), 2021-01-01
Supplement: d1tc02749b1.pdf [file d1tc02749b1.pdf]

## Supporting Information

### A strategy towards melanin-based functional material: rGO and sulfonated melanin composites

Bruna Andressa Bregadiolli<sup>a\*</sup>, João Vitor Paulin<sup>b</sup>, Luiz Gustavo Simão Albano<sup>c</sup>, Lucas Michelão  
Martins<sup>a</sup>, Davi Henrique Starnini de Camargo<sup>c</sup>, Luiz Carlos da Silva Filho<sup>b,d</sup>, Carlos Cesar Bof  
Bufon<sup>b,c</sup> and Carlos Frederico de Oliveira Graeff<sup>a,b</sup>

<sup>a</sup> São Paulo State University (UNESP), School of Sciences, Department of Physics, Bauru, Brazil;

<sup>b</sup> São Paulo State University (UNESP), School of Sciences, Postgraduate Program in Science and  
Technology of Materials (POSMAT), Bauru, Brazil;

<sup>c</sup> Brazilian Nanotechnology National Laboratory (LNNano), Brazilian Center for Research in  
Energy and Materials (CNPEM), Campinas, Brazil;

<sup>d</sup> São Paulo State University (UNESP), School of Sciences, Department of Chemistry, Bauru,  
Brazil.

### Table of contents

Total number of pages: **18**

Number of Figures: **20**

Number of Tables: **01**

|                  |     |
|------------------|-----|
| Figure S1 .....  | S2  |
| Figure S2 .....  | S2  |
| Figure S3 .....  | S3  |
| Figure S4 .....  | S4  |
| Figure S5 .....  | S5  |
| Figure S6 .....  | S6  |
| Figure S7 .....  | S6  |
| Figure S8 .....  | S7  |
| Figure S9 .....  | S7  |
| Figure S10 ..... | S8  |
| Figure S11 ..... | S9  |
| Figure S12 ..... | S10 |
| Figure S13 ..... | S11 |
| Figure S14 ..... | S12 |
| Figure S15 ..... | S13 |
| Figure S16 ..... | S14 |
| Figure S17 ..... | S15 |
| Figure S18 ..... | S16 |
| Figure S19 ..... | S17 |
| Figure S20 ..... | S18 |
| Table S1 .....   | S17 |

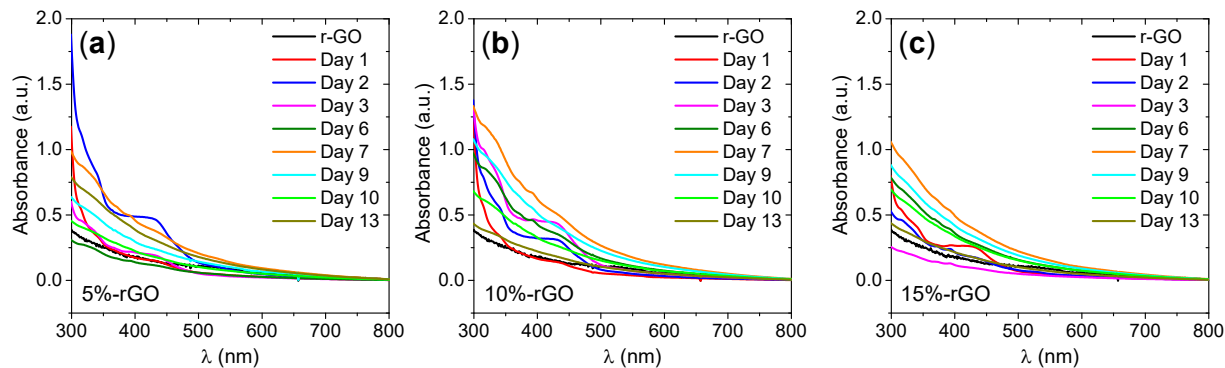

**Figure S1:** Evolution of the absorbance spectra of the composite's synthesis. With time the 450 nm absorption band decrease (indicating that the melanin precursor is being consumed) and a broad-band featureless spectrum characteristic of melanin appears.

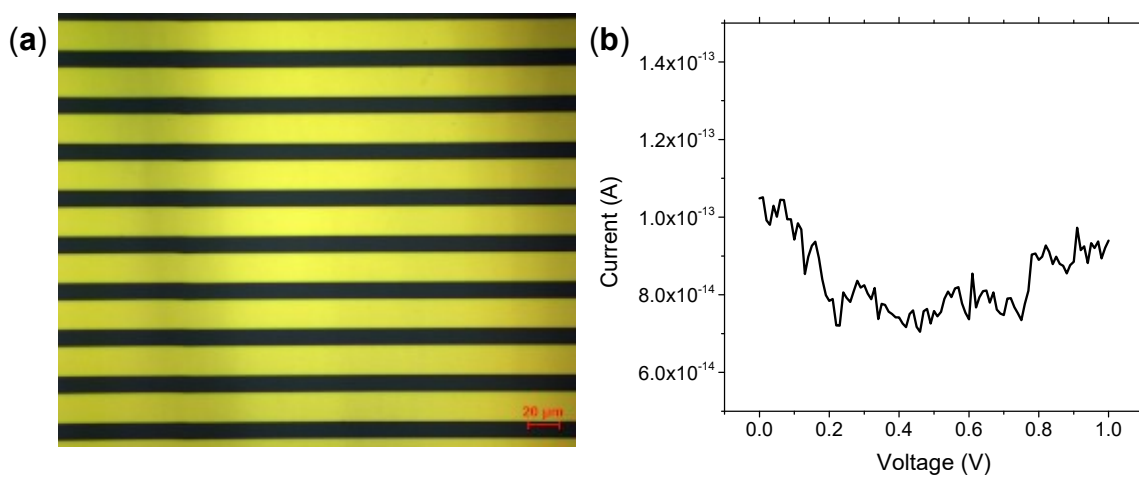

**Figure S2:** (a) Optical image of IDE electrode and (b) interdigitated electrode leakage current.

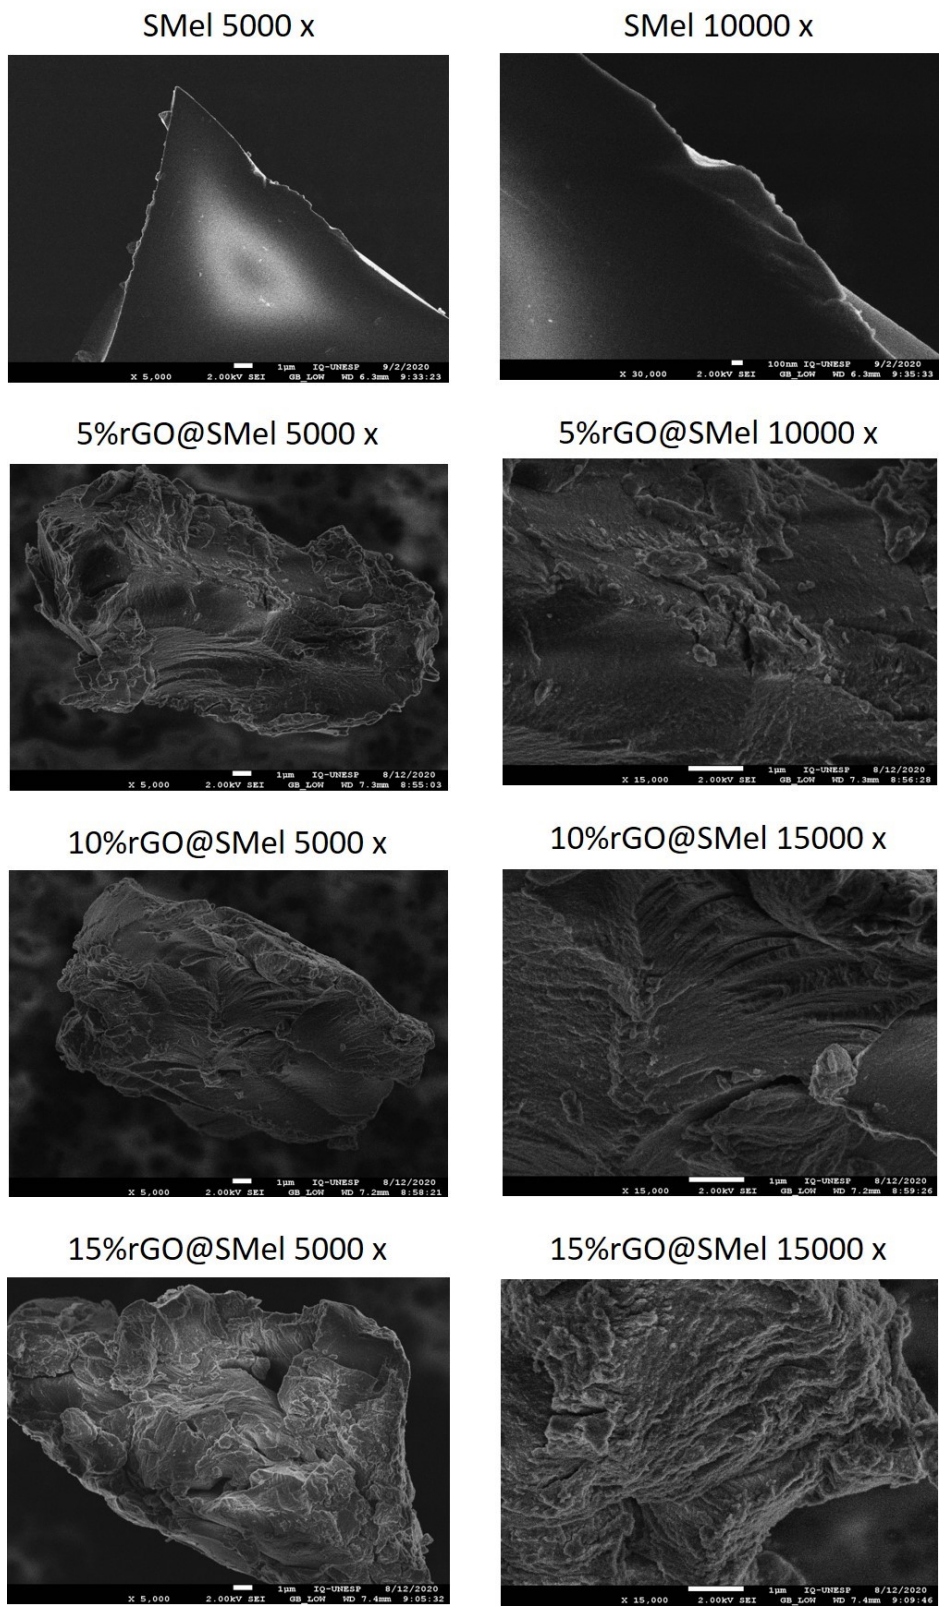

**Figure S3:** FEG-SEM images with different magnifications for the samples SMel and rGO@SMel composites.

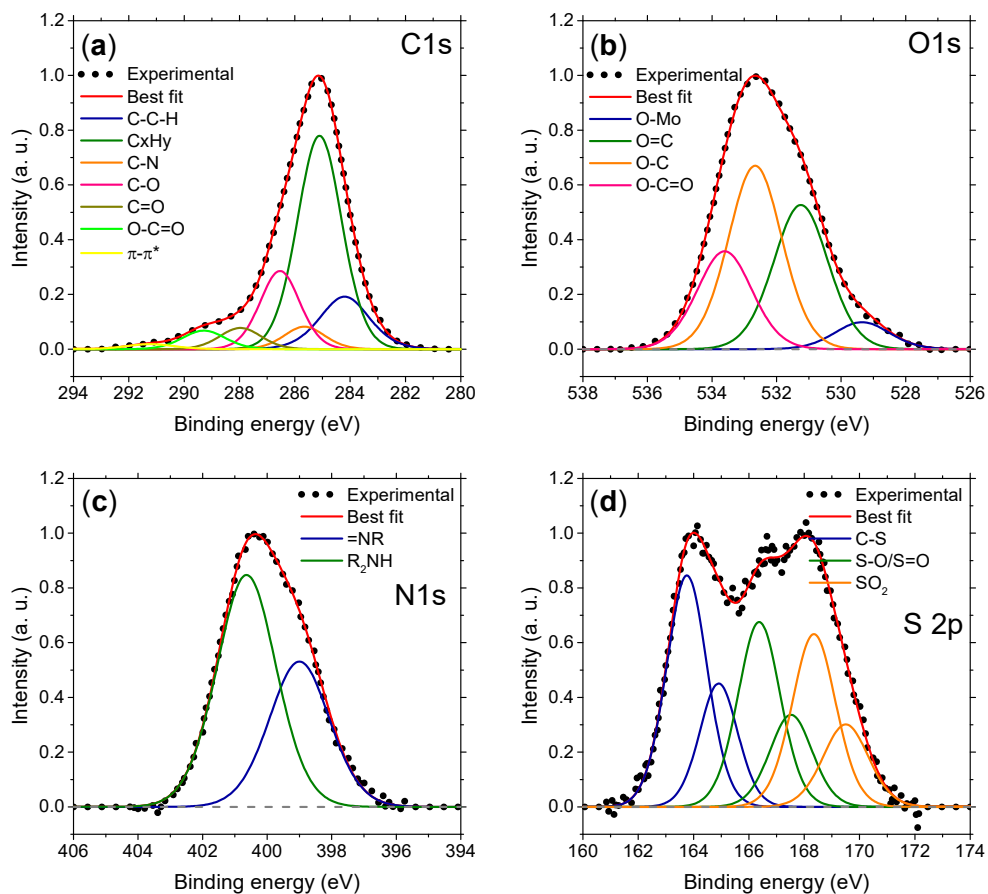

**Figure S4:** (a) C1s, (b) O1s, (c) N1s and (d) S 2p high-resolution XPS spectra of the SMel. O-Mo at O1s region is related to sample support.

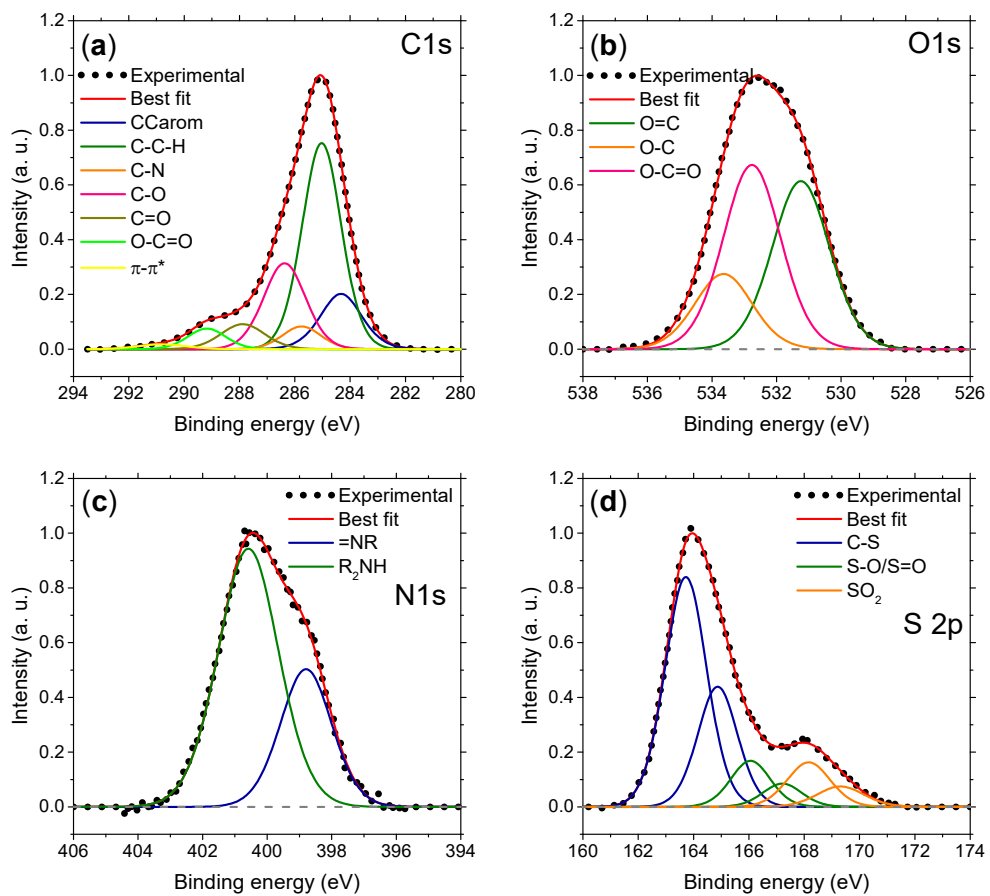

**Figure S5:** (a) C1s, (b) O1s, (c) N1s and d) S high-resolution XPS spectra of the 5%rGO@SMel.

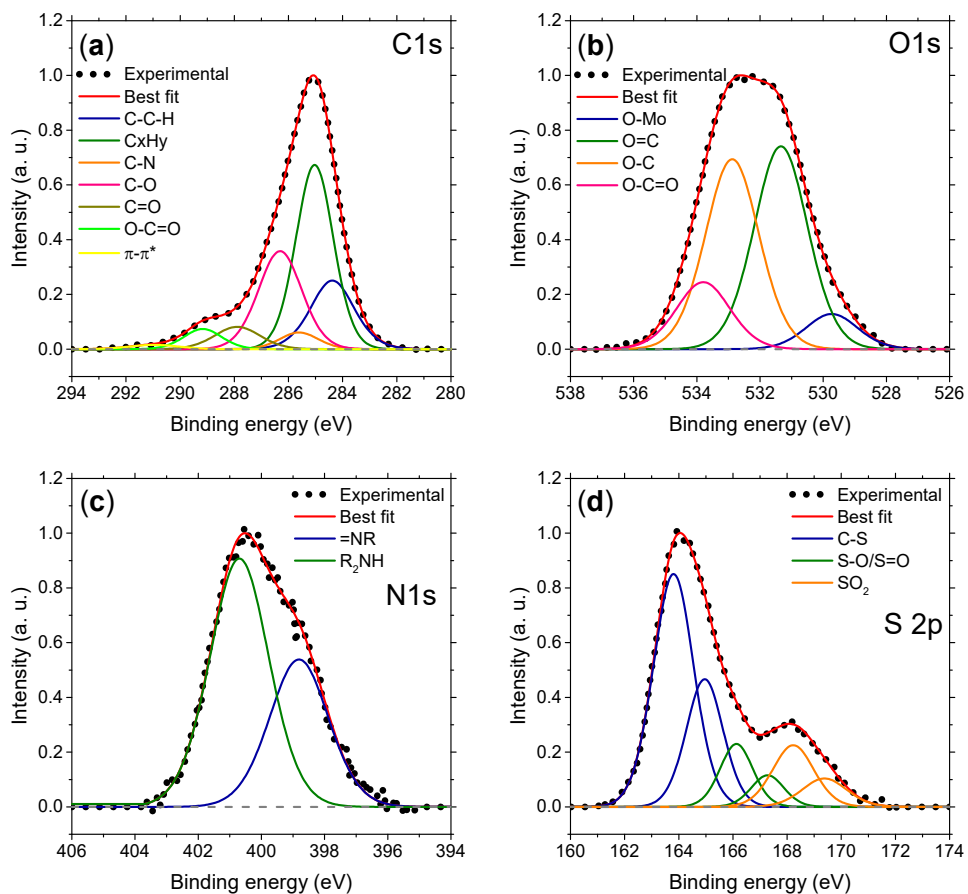

**Figure S6:** (a) C1s, (b) O1s, (c) N1s and (d) S 2p high-resolution XPS spectra of the 15%rGO@SMel. O-Mo at O1s region is related to sample support.

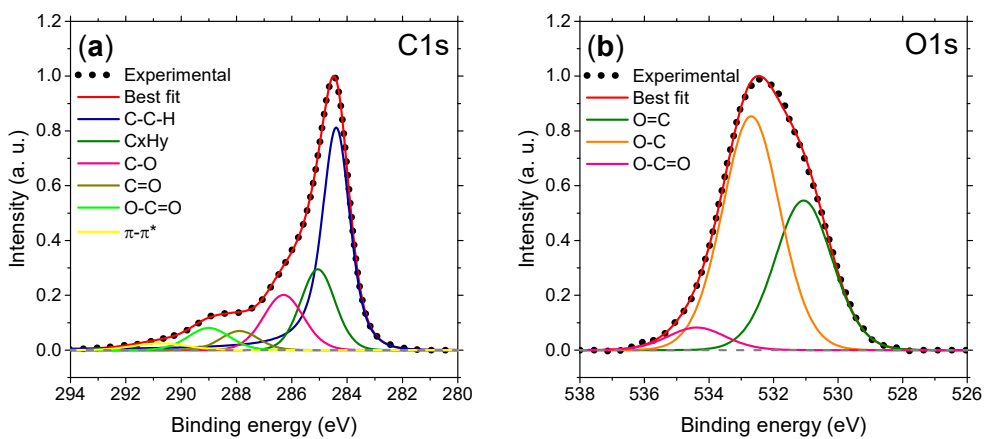

**Figure S7:** (a) C1s and (b) O1s high-resolution XPS spectra of rGO.

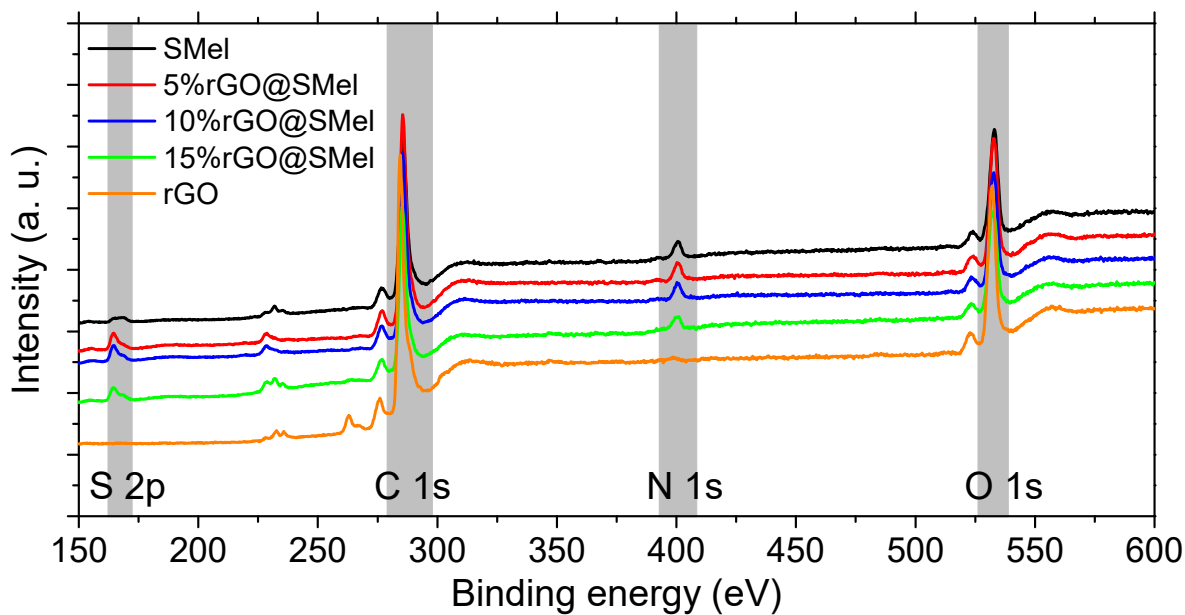

**Figure S8:** XPS Survey scan for the different samples studied.

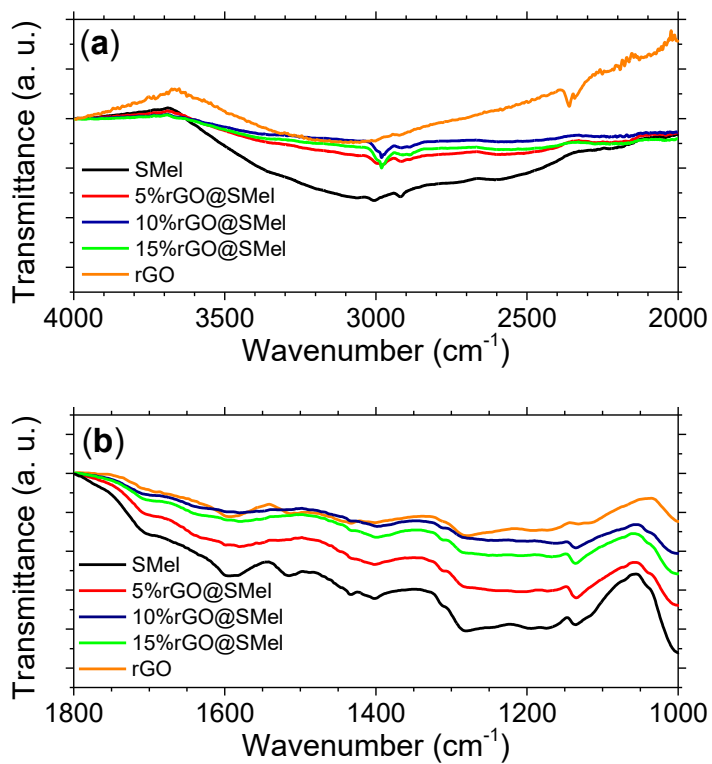

**Figure S9:** FTIR spectra of SMel, 5%SMel@rGO, 10%SMel@rGO and 15%SMel@rGO.

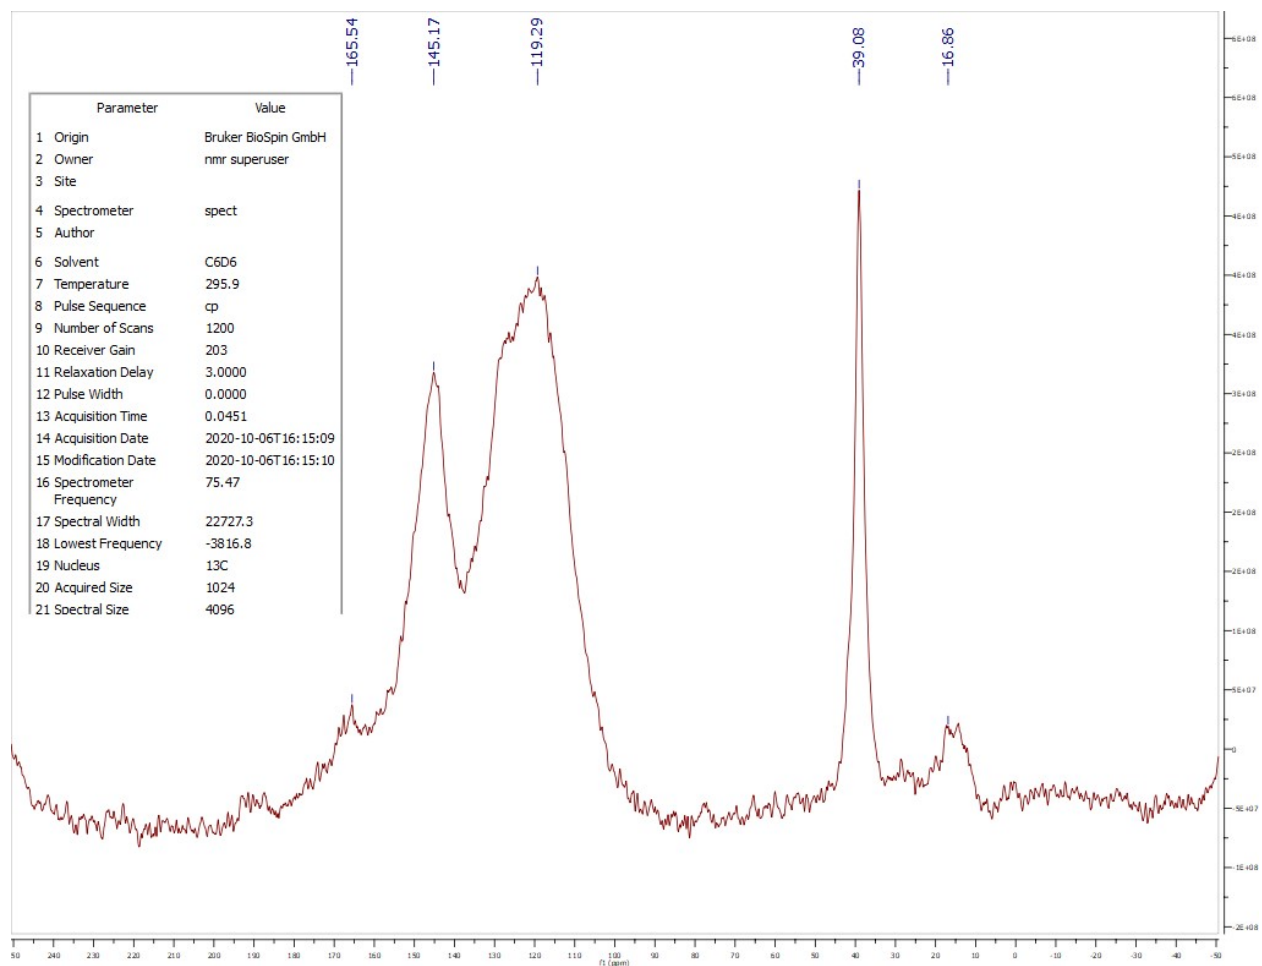

**Figure S10:**  $^{13}\text{C}$  CP/MAS NMR spectra of SMel.



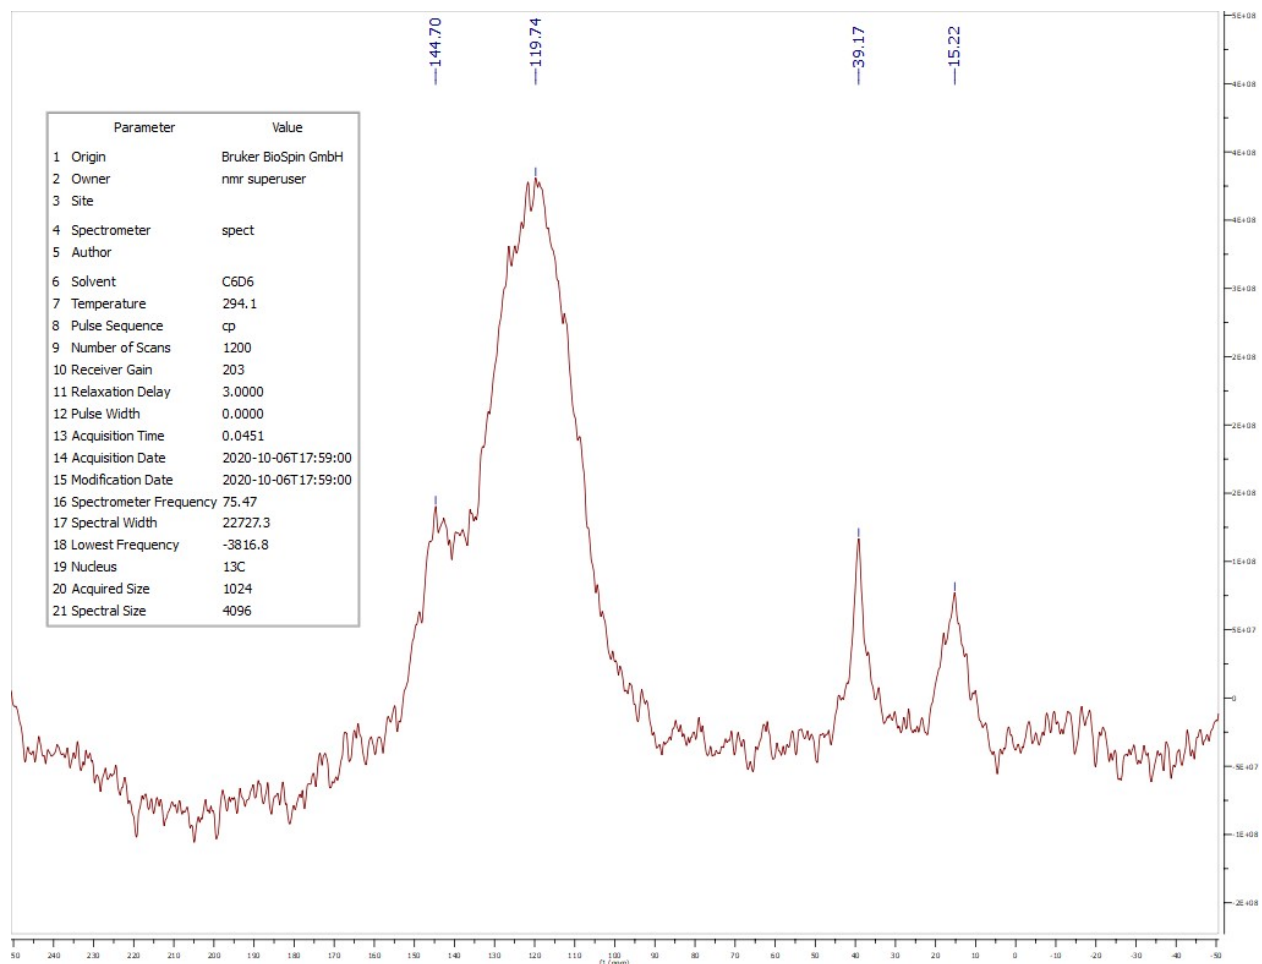

**Figure S11:**  $^{13}\text{C}$  CP/MAS NMR spectra of 5%rGO@SMel.

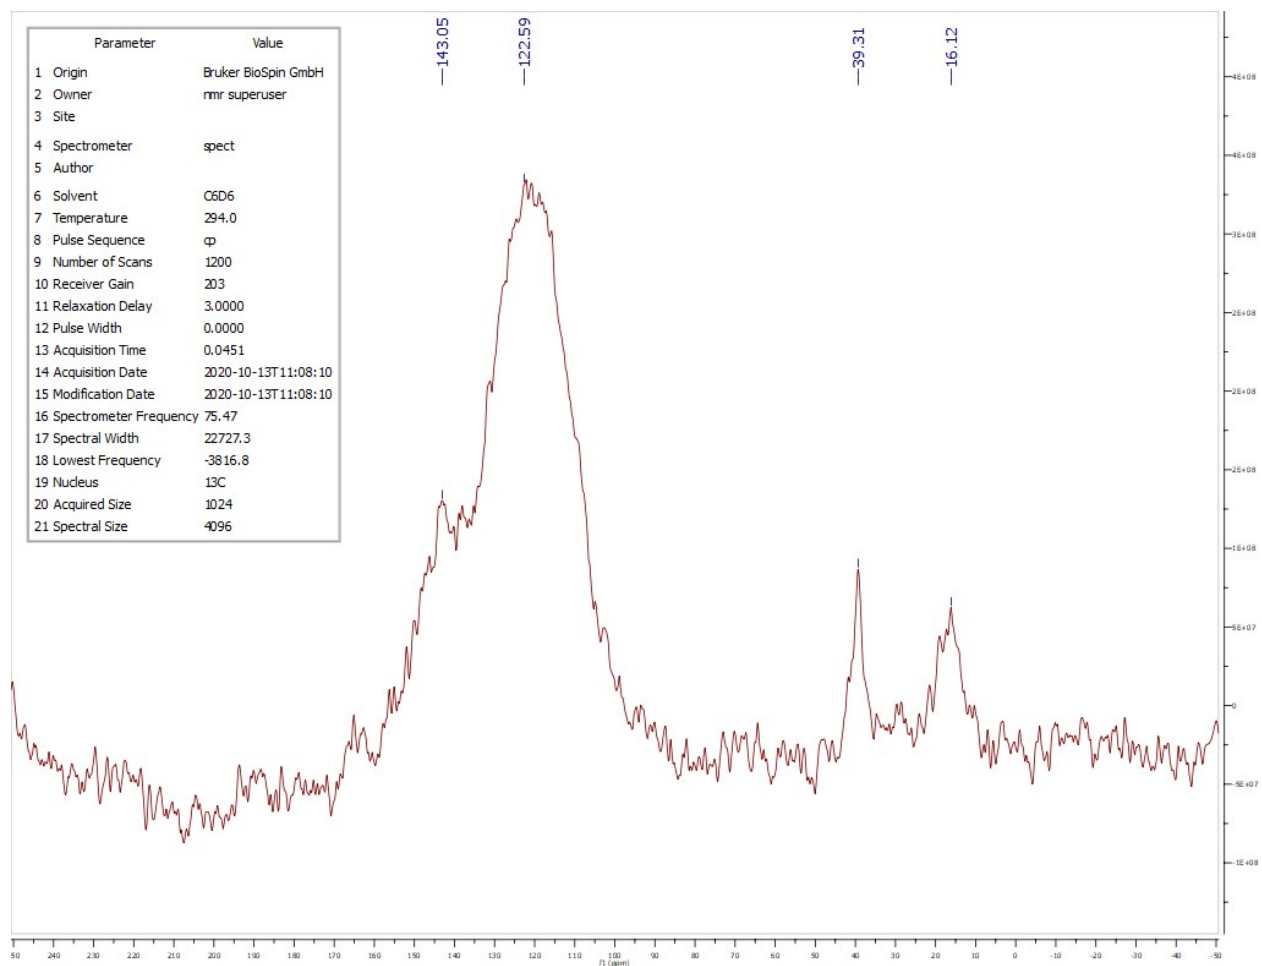

**Figure S12:** <sup>13</sup>C CP/MAS NMR spectra of 10%rGO@SMel.

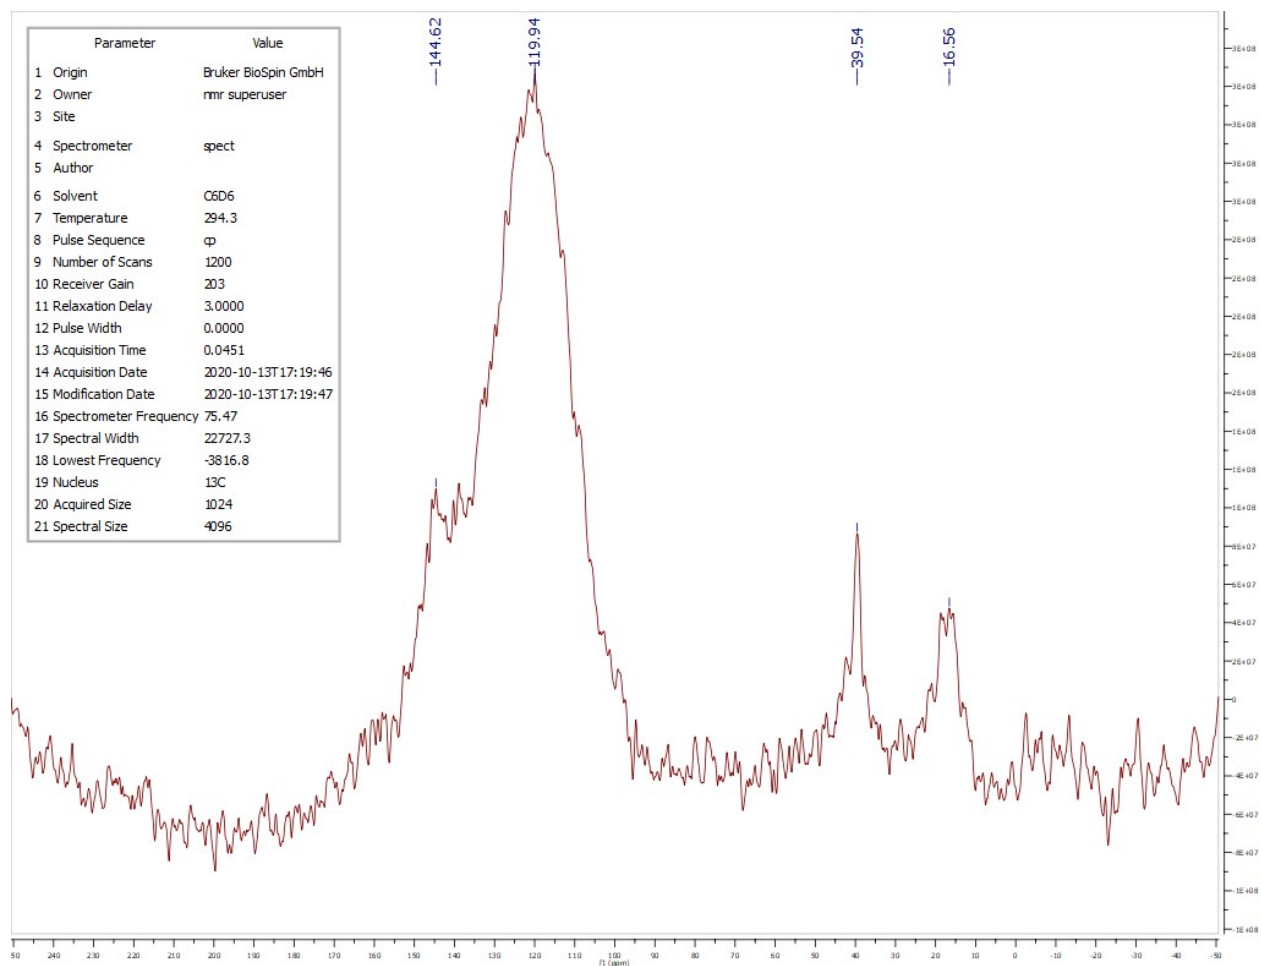

**Figure S13:** <sup>13</sup>C CP/MAS NMR spectra of 15%rGO@SMel.

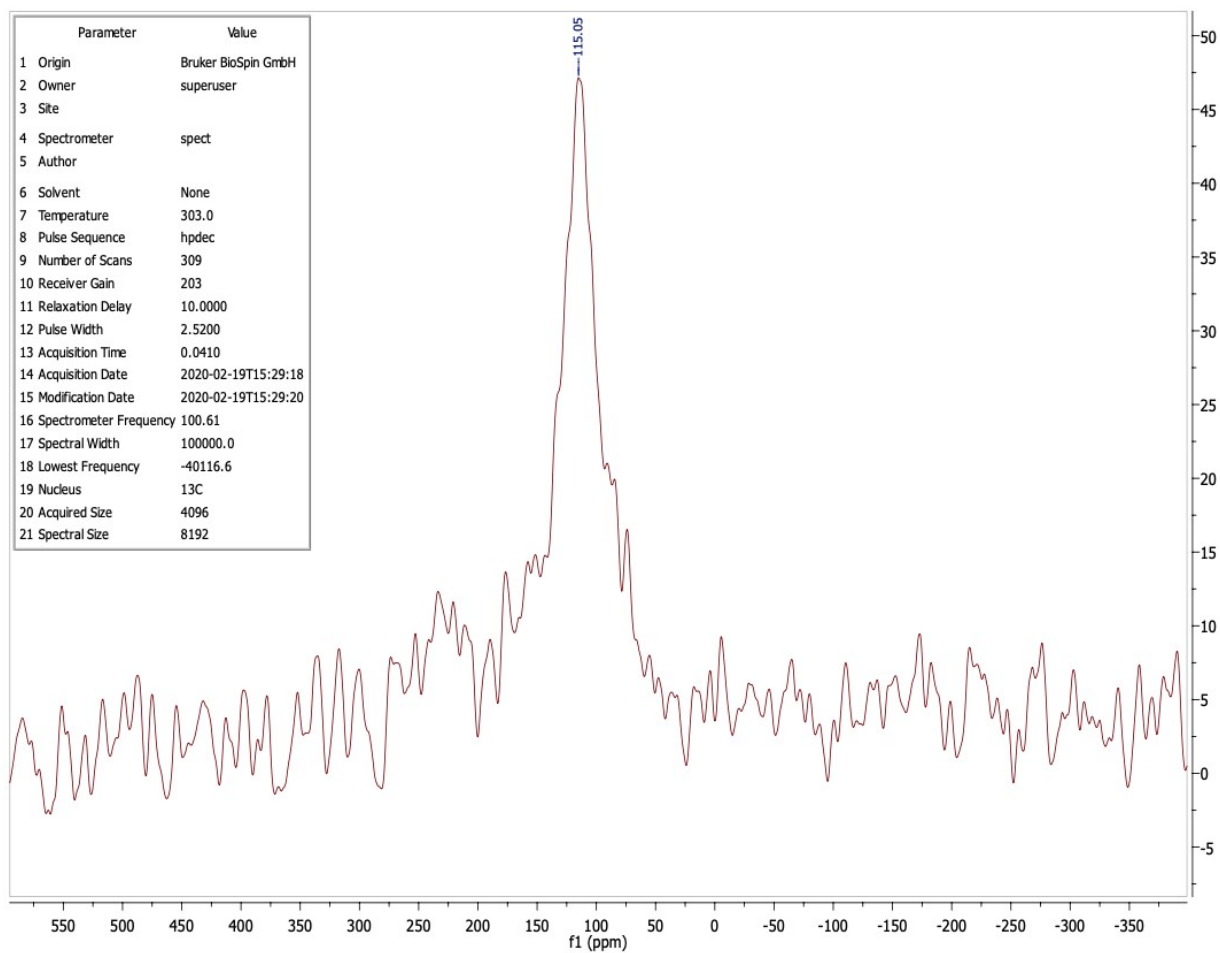

**Figure S14:** <sup>13</sup>C CP/MAS NMR spectra of rGO.

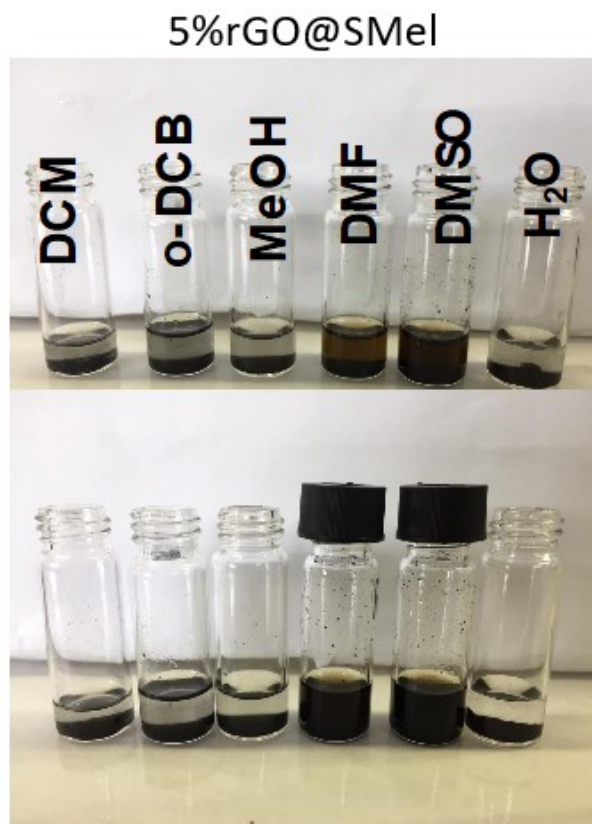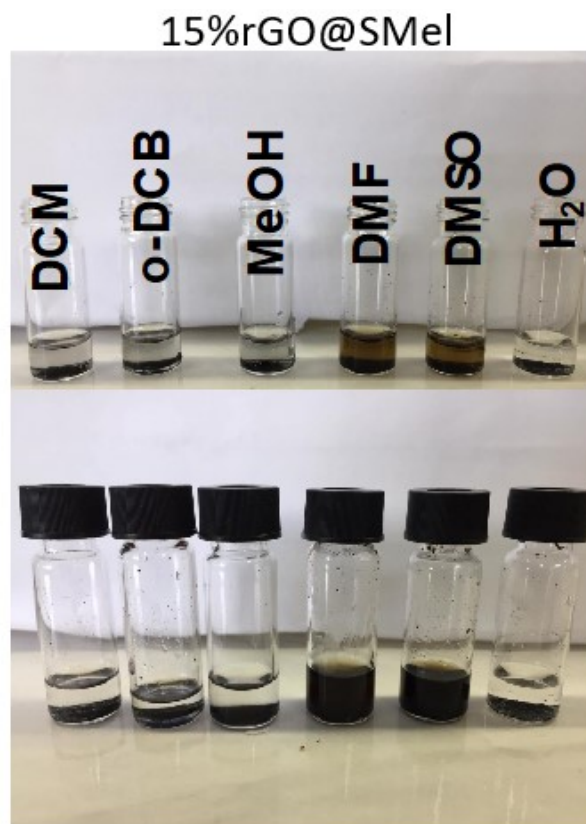

**Figure S15:** Solubility test of the composites 5%rGO@SMel and 15%rGO@SMel in dichloromethane, o-dichlorobenzene, methanol, dimethylformamide, dimethyl sulfoxide and water.

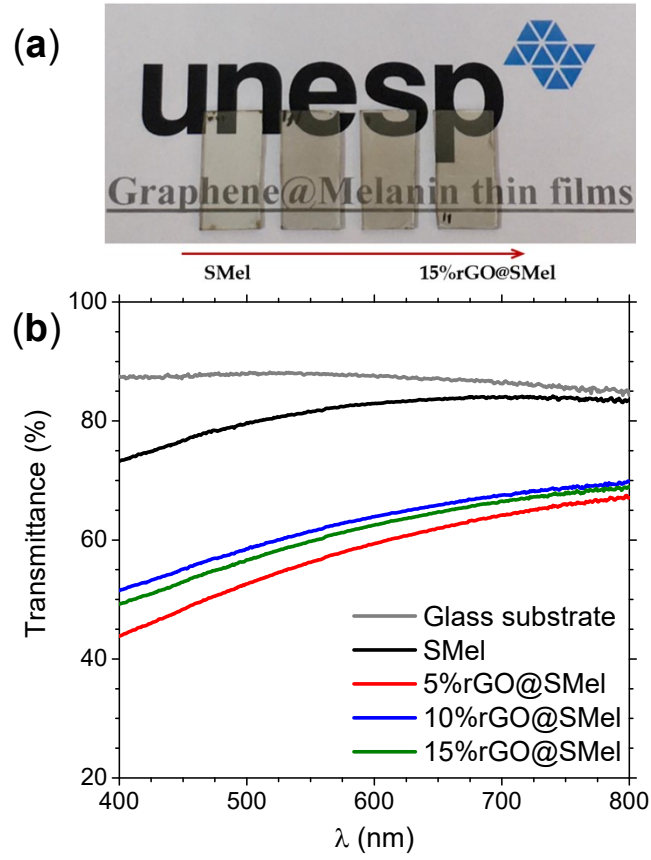

**Figure S16:** (a) Optical image and (b) transmittance spectra of SMel and rGO@SMel composites thin films.

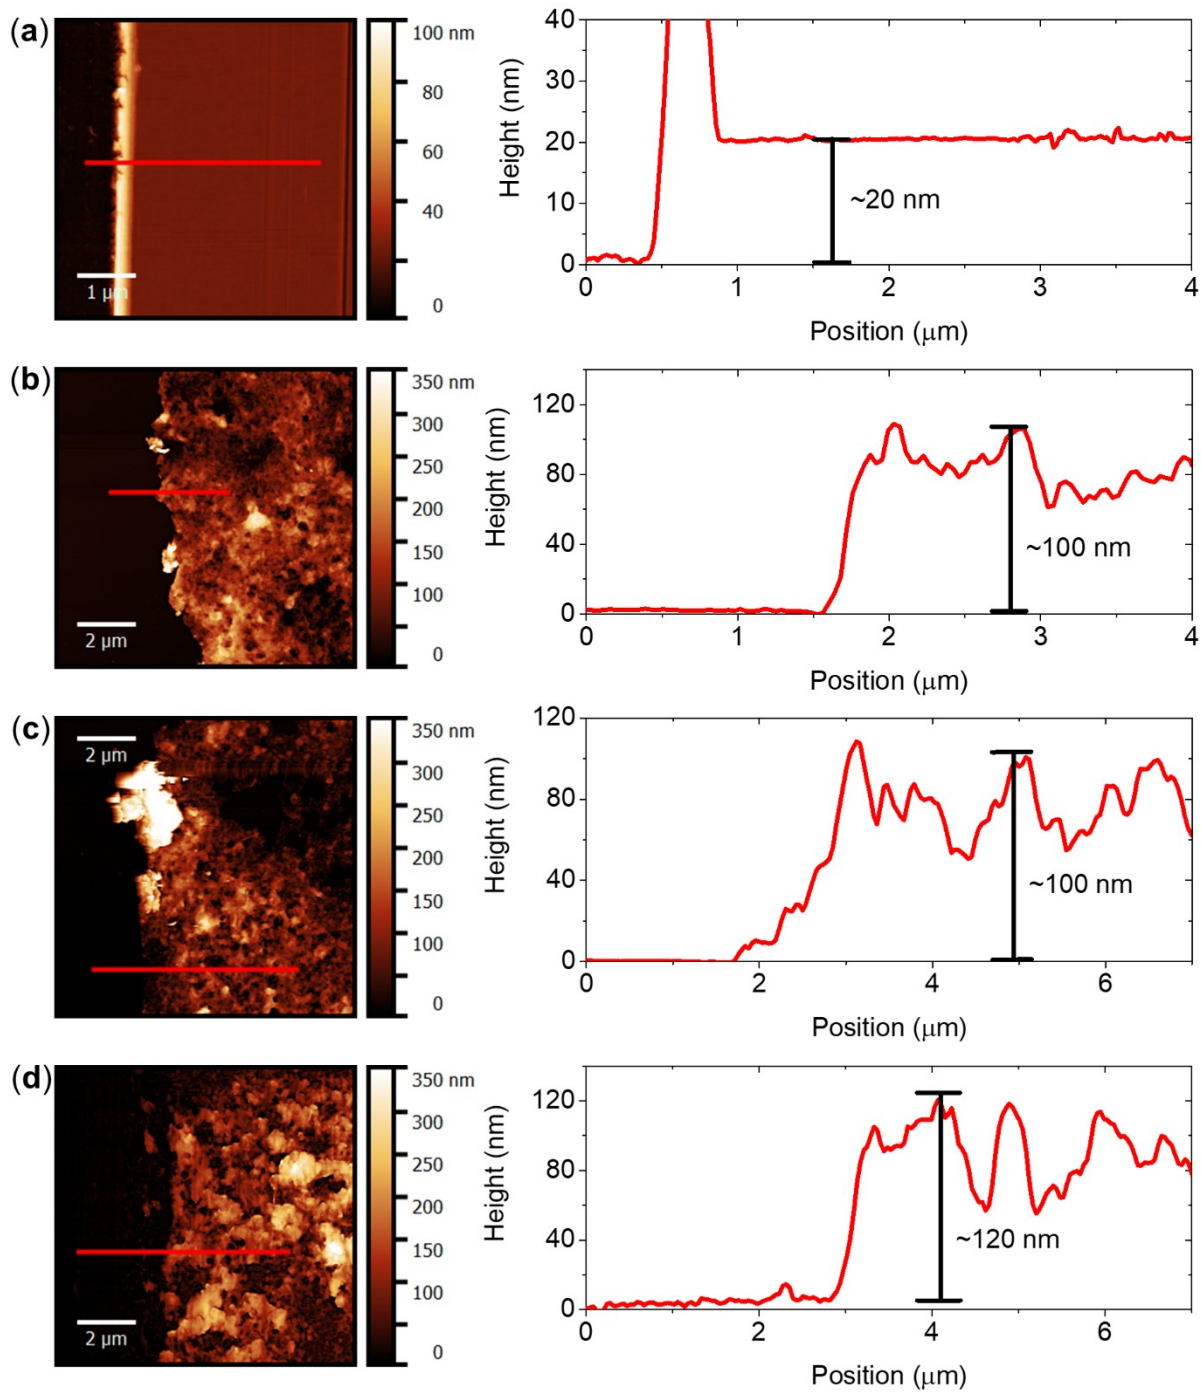

**Figure S17:** AFM topography images and thickness profiles (red lines): (a) SMel, (b) 5%rGO@SMel, (c) 10%rGO@SMel and (d) 15%rGO@SMel.

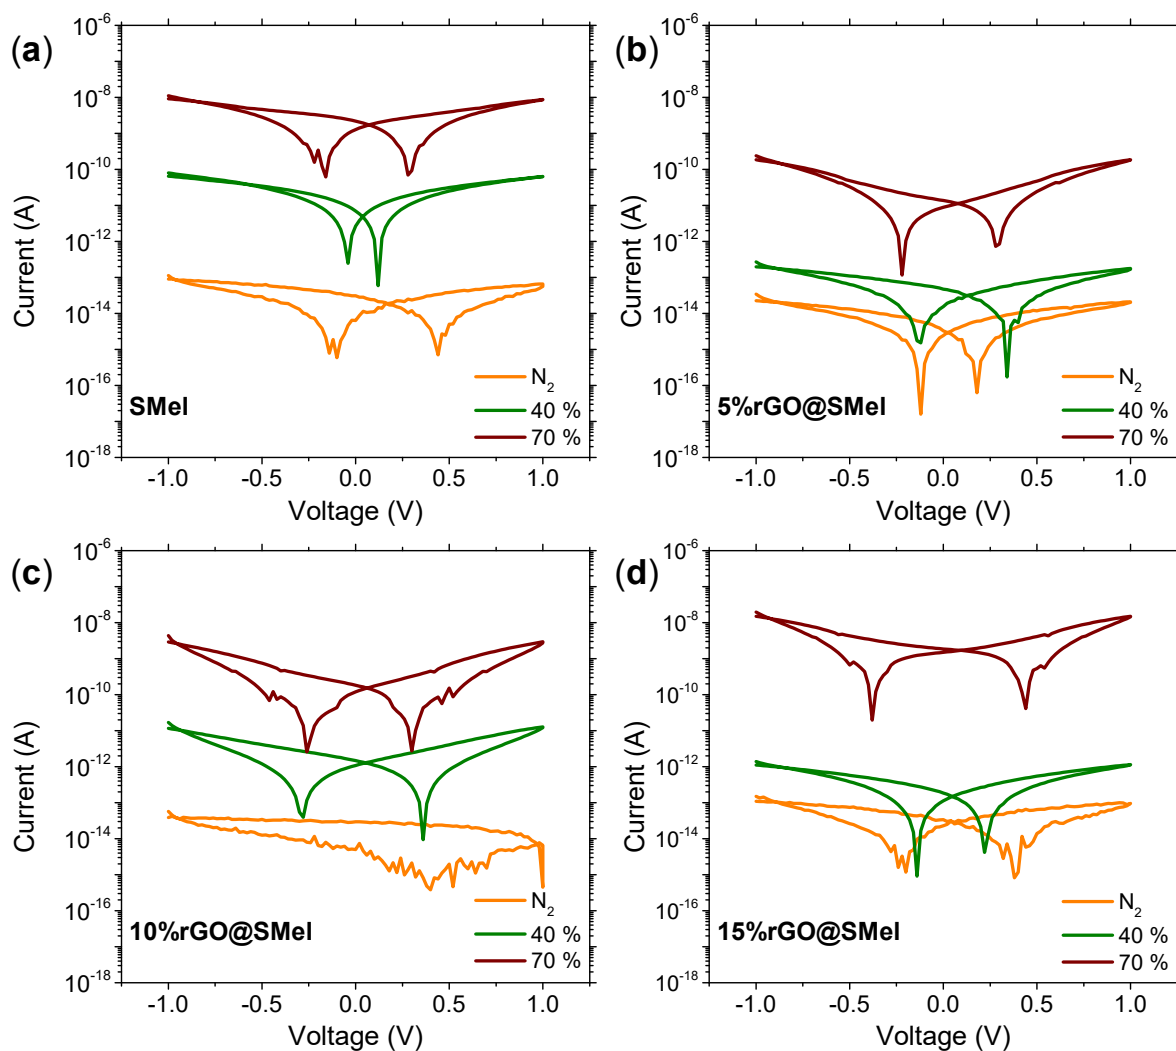

**Figure S18:** Current vs. voltage characteristics of (a) SMel and (b, c and d) rGO@SMel composites in different humidity levels:  $N_2$ , 40 % and 70 % RH. The IV curves were plotted on a log-linear scale to show the humidity dependence of the different rGO@SMel composites.



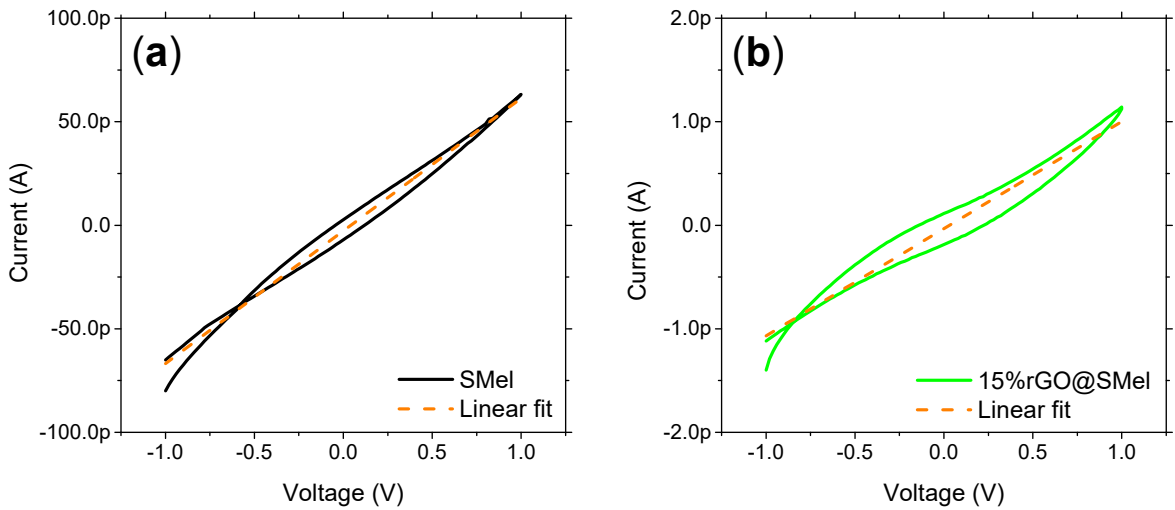

**Figure S19:** Example of fitting used to calculate the conductivity at 40% RH for (a) SMel and (b) 15%rGO@SMel composite. Similar behavior was obtained for the other samples and RH.

**Table S1:** Fitting parameters used to fit the data according to the equivalent circuit at 70% hydration level. The Warburg diffusion element is divided in three components: W-R represents the diffusion impedance, W-T is the system diffusion time and W-P is an exponential factor.

| Sample           | SMel     | 5%rGO@SMel | 10%rGO@SMel | 15%rGO@SMel |
|------------------|----------|------------|-------------|-------------|
| $R_1$            | 1.74E+02 | 1.77E+02   | 1.87E+02    | 2.12E+02    |
| $R_2$            | 4.15E+08 | 4.90E+8    | 1.66E+07    | 3.02E+05    |
| W-R              | 9.14E+07 | 9.13E+07   | 8.22E+07    | 3.36E+08    |
| W-T              | 4.30E-03 | 8.06E-11   | 1.59E-04    | 5.21E+03    |
| W-P              | 1.90E-01 | 0.62E-01   | 1.13E+00    | 4.06E-01    |
| CPE-T            | 1.16E-10 | 1.18E-10   | 1.13E-10    | 1.20E-10    |
| CPE-P ( $\eta$ ) | 0.99545  | 0.99477    | 0.99762     | 0.99587     |

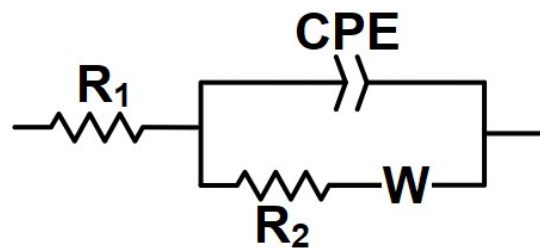

**Figure S20:** Representation of the equivalent circuit for the composite's characterization in between gold electrodes.
